# Supplementary material
Source: PubMed Central journal article supplement (PMC6481310)

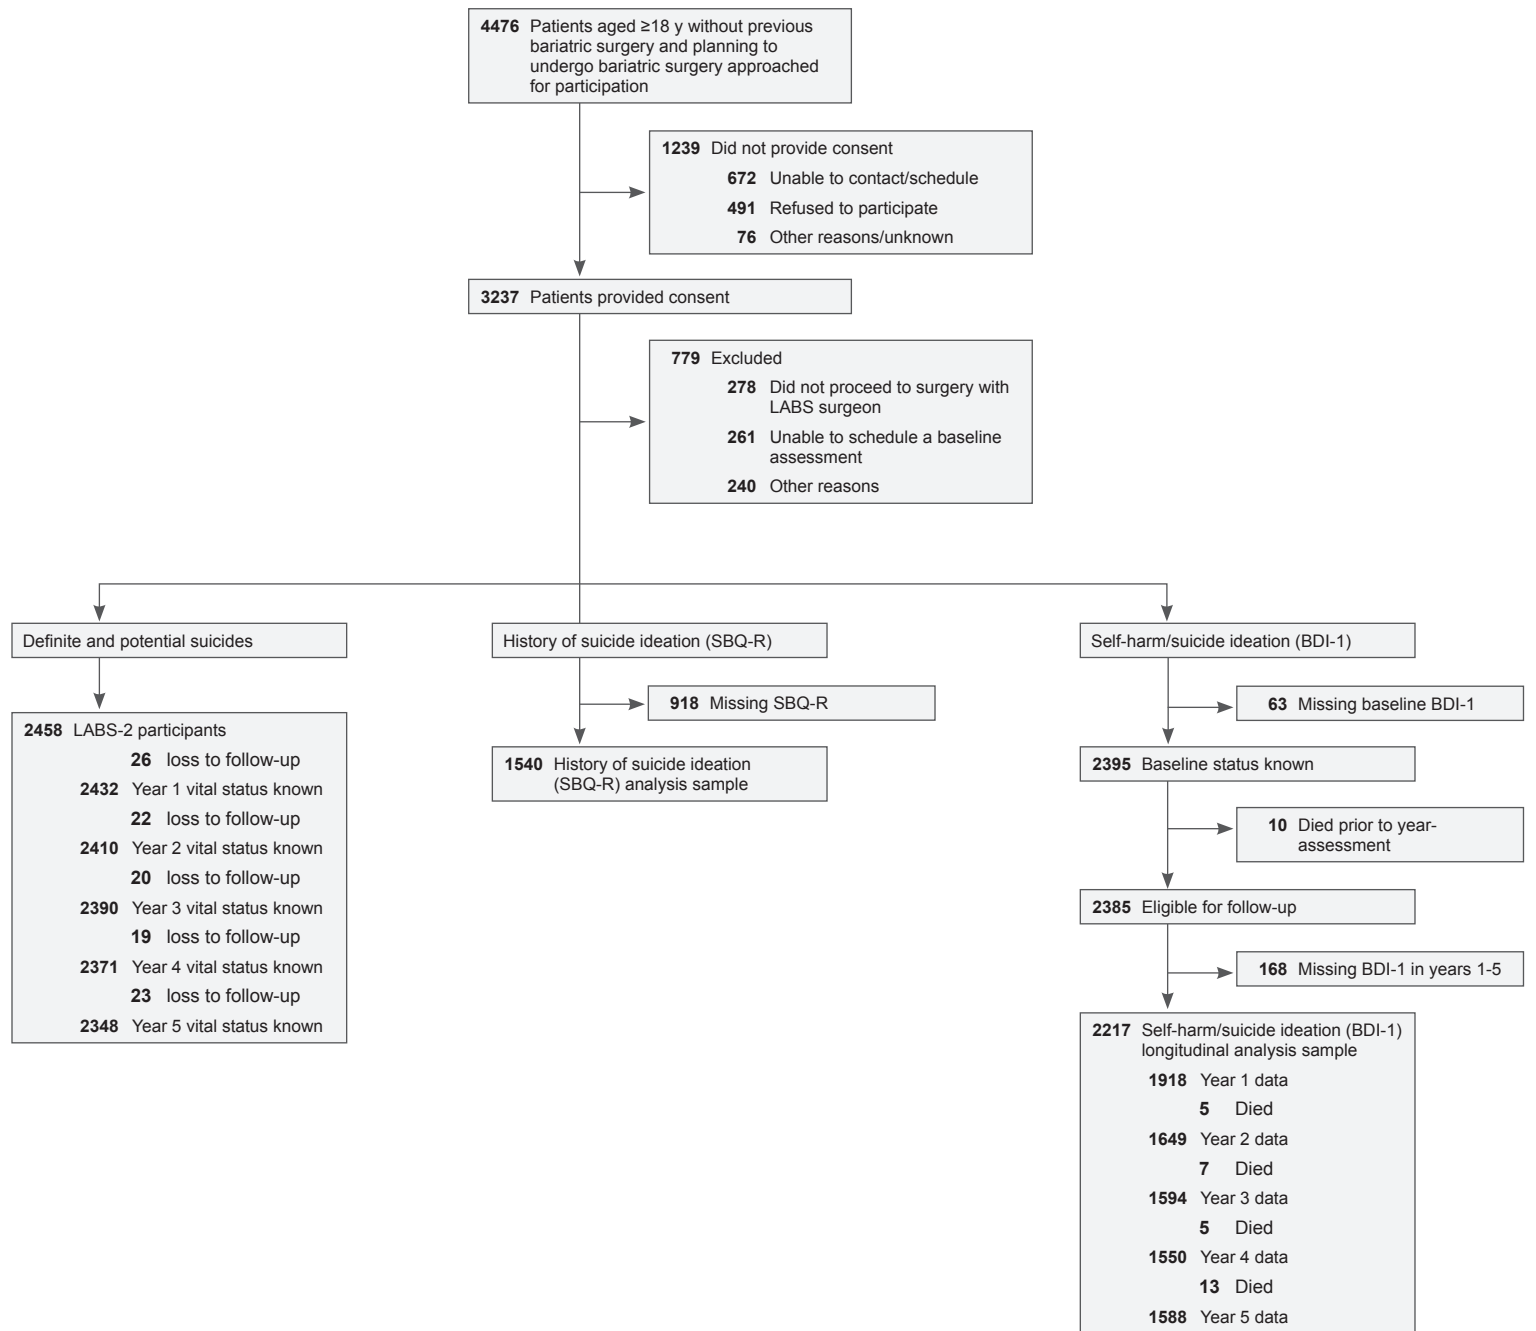

Supplement: NIHMS1515985-supplement-2.pdf [file NIHMS1515985-supplement-2.pdf]
